# HIV-Induced T-Cell Activation/Exhaustion in Rectal Mucosa Is Controlled Only Partially by Antiretroviral Treatment

Cesar Mauricio Rueda<sup>1</sup>, Paula Andrea Velilla<sup>1</sup>, Claire A. Chougnat<sup>2</sup>, Carlos Julio Montoya<sup>1</sup>, Maria Teresa Rugeles<sup>1\*</sup>

**1** Grupo Inmunovirología, Universidad de Antioquia, Medellín, Antioquia, Colombia, **2** Division of Molecular Immunology, Cincinnati Children's Hospital Research Foundation, Department of Pediatrics, University of Cincinnati College of Medicine, Cincinnati, Ohio, United States of America

## Abstract

Peripheral blood T-cells from untreated HIV-1-infected patients exhibit reduced immune responses, usually associated with a hyperactivated/exhausted phenotype compared to HAART treated patients. However, it is not clear whether HAART ameliorates this altered phenotype of T-cells in the gastrointestinal-associated lymphoid tissue (GALT), the main site for viral replication. Here, we compared T-cells from peripheral blood and GALT of two groups of chronically HIV-1-infected patients: untreated patients with active viral replication, and patients on suppressive HAART. We characterized the T-cell phenotype by measuring PD-1, CTLA-4, HLA-DR, CD25, Foxp3 and granzyme A expression by flow cytometry; mRNA expression of T-bet, GATA-3, ROR- $\gamma$ t and Foxp3, and was also evaluated in peripheral blood mononuclear cells and rectal lymphoid cells. In HIV-1+ patients, the frequency of PD-1<sup>+</sup> and CTLA-4<sup>+</sup> T-cells (both CD4<sup>+</sup> and CD8<sup>+</sup> T cells) was higher in the GALT than in the blood. The expression of PD-1 by T-cells from GALT was higher in HIV-1-infected subjects with active viral replication compared to controls. Moreover, the expression per cell of PD-1 and CTLA-4 in CD4<sup>+</sup> T-cells from blood and GALT was positively correlated with viral load. HAART treatment decreased the expression of CTLA-4 in CD8<sup>+</sup> T cells from blood and GALT to levels similar as those observed in controls. Frequency of Granzyme A<sup>+</sup> CD8<sup>+</sup> T-cells in both tissues was low in the untreated group, compared to controls and HAART-treated patients. Finally, a switch towards Treg polarization was found in untreated patients, in both tissues. Together, these findings suggest that chronic HIV-1 infection results in an activated/exhausted T-cell phenotype, despite T-cell polarization towards a regulatory profile; these alterations are more pronounced in the GALT compared to peripheral blood, and are only partially modulated by HAART.

**Citation:** Rueda CM, Velilla PA, Chougnat CA, Montoya CJ, Rugeles MT (2012) HIV-Induced T-Cell Activation/Exhaustion in Rectal Mucosa Is Controlled Only Partially by Antiretroviral Treatment. PLoS ONE 7(1): e30307. doi:10.1371/journal.pone.0030307

**Editor:** Derya Unutmaz, New York University, United States of America

**Received:** July 28, 2011; **Accepted:** December 13, 2011; **Published:** January 19, 2012

**Copyright:** © 2012 Rueda et al. This is an open-access article distributed under the terms of the Creative Commons Attribution License, which permits unrestricted use, distribution, and reproduction in any medium, provided the original author and source are credited.

**Funding:** This study was supported by Colciencias (grant 111540820490-1), Programa de Sostenibilidad 2011–2012 (Vicerrectoría de Investigaciones, Universidad de Antioquia, Medellín, Colombia) and National Institutes of Health R01 AI068524 (to CAC). CMR is a recipient of a doctoral scholarship. The funders had no role in the design of the study, data collection and analysis, decision to publish, or preparation of the manuscript.

**Competing Interests:** The authors have declared that no conflicts of interest exist.

\* E-mail: mtrugel@udea.edu.co

## Introduction

During the acute phase of human immunodeficiency virus type 1 (HIV-1) infection, the gastrointestinal-associated lymphoid tissue (GALT) suffers the most substantial immunological and structural damage due to massive elimination of CD4<sup>+</sup>CCR5<sup>+</sup> T-cells, as a result of high levels of viral replication [1,2]. This event leads to microbial product translocation from the lumen of the gastrointestinal tract to systemic circulation [3,4], contributing to the establishment of chronic immune activation [5]. Concomitantly, there is a progressive loss of the regenerative capacity of the lymphoid tissue [6]. Alteration of antigen-presenting cells and T-cells are distinctive; in particular, reduced proliferation and cytokine production by T-cells occurs in response to different stimuli. Many of these defects persist in patients receiving highly active antiretroviral therapy (HAART) [7,8].

HLA-DR, CD25 and granzymes are molecules associated with activation and effector functions of CD8 T-cells. Indeed, activation of cytotoxic T-cells has been correlated with the control of viral

replication, and is one of the best predictors of disease progression [9]. Other markers such as programmed death 1 (PD-1) and the cytotoxic T-lymphocyte antigen 4 (CTLA-4) are classically associated with activation, and persistence of high levels of expression of these markers by peripheral blood T cells of untreated patients is linked to T-cell exhaustion [10]. PD-1 and CTLA-4 upregulation appear closely linked to HIV replication and progressive disease; in fact, specific blockage of these pathways with monoclonal antibodies enhances HIV-1-specific T-cell responses [11,10].

Although HAART has significantly improved the quality of life of HIV-1-infected patients and particularly their life expectancy, incomplete suppression of viral replication and partial restoration of CD4<sup>+</sup> T-cells are often seen in GALT, in contrast to peripheral blood, despite continuous use of HAART [12]. Since GALT is a highly regulated tissue and the main site of HIV-1 replication, a detailed phenotypic characterization of its T-cell subsets and their modulation by HAART, is important to better understand HIV-1 pathogenesis.

Considering that GALT disruption induces T-cell activation/exhaustion, in parallel with regulatory processes that are associated with the inability of the immune system to mount effective responses against HIV-1 and other pathogens [13,14], we were interested in characterizing the immune response in GALT. Our results suggest that HIV-1 infection induces a pattern of T cell activation/exhaustion, affecting both CD4<sup>+</sup> and CD8<sup>+</sup> T cells, despite increased polarization towards a regulatory profile. These changes are clearer in GALT than in peripheral blood. Importantly, HAART does not totally normalize this phenotype.

## Results

### Patient characteristics

As shown in Table 1, groups were matched by age. The macroscopic evaluation of rectosigmoidoscopies was normal in all individuals. No evidence of active opportunistic infections and tumors was detected in any of the HIV-1-infected subjects at the time of sampling. Patients on HAART (H) had been on antiretroviral therapy for a median of 9 (6-13) years; all patients except 2 had an absolute CD4<sup>+</sup> T-cell count above 300 cells/mm<sup>3</sup>. In this group, 62% (8/13 patients) presented an undetectable viral load (VL; <40 copies/ml), 31% (4/13 patients) had <290 copies/ml, and 1 patient had a VL>1,000 copies/ml (1,193 copies/ml) at the time of sampling. 80% of the untreated patients (U) had CD4 counts >250 cells/mm<sup>3</sup> and 70% of them had a VL>20,000 copies/ml. As expected, the median VL of the untreated group was significantly higher than that of the treated group ( $p<0.001$ ). The percentage and absolute counts of CD8<sup>+</sup> T-cells were high in all infected individuals compared to controls (C), with the highest values found in the untreated group (Table 1).

To evaluate the efficacy of HAART on the reconstitution of CD4<sup>+</sup> T cells, we determined the CD4<sup>+</sup>/CD8<sup>+</sup> T cell ratio in both peripheral blood and GALT. In controls, the CD4<sup>+</sup>/CD8<sup>+</sup> T cell ratio in blood was 2.22 (1.22-2.87); however, in normal GALT the frequency of CD4<sup>+</sup> and CD8<sup>+</sup> T cells was similar with a ratio of 1.26 (0.63-2.37). On HIV-1+ patients, the depletion of CD4<sup>+</sup> T cells is clear in both compartments; with an incomplete reconstitution even after prolonged suppressive therapy on PMBC (H:0.47 vs C: 2.22;  $p<0.01$ ) and GALT (H:0.34 vs C: 1.26;  $p<0.01$ ). The CD4<sup>+</sup>/CD8<sup>+</sup> T cell ratio was strikingly low on the untreated group, with a ratio of 0.30 (0.004-0.69) (U vs C;  $p<0.001$ ) and 0.14 (0.03-0.29) (U vs C;  $p<0.001$ ) in PMBC and GALT, respectively.

### GALT T-cells from untreated HIV-1-infected patients express high levels of molecules associated with immune activation and exhaustion

An important hallmark of chronic HIV-1 infection is the immune activation, which leads to T-cell exhaustion, characterized by the persistent expression by lymphocytes of markers, such as HLA-DR, CD25, PD-1 and CTLA-4. We determined the expression of these molecules in both subpopulations of GALT T-cells and compared it to that of peripheral blood T-cells.

As shown in Figure 1A left, the frequency of CD4<sup>+</sup>HLA-DR<sup>+</sup> T cells in GALT was higher in untreated HIV-1-infected individuals than in controls or HAART-treated patients ( $p<0.05$ ). The frequency of peripheral blood CD4<sup>+</sup>HLA-DR<sup>+</sup> T-cells was higher in both groups of HIV-1-infected individuals compared to controls (median percentage: U: 14.9% vs C: 7.0%;  $p<0.05$  and H: 17.2% vs C: 7.0%;  $p<0.00$ ; data not shown). The frequency of CD8<sup>+</sup>HLA-DR<sup>+</sup> T-cells in GALT was similar in the three groups of individuals (Fig. 1A, right); in peripheral blood, it was higher in untreated patients than in controls (U: 6.2% vs C: 2.4%;  $p<0.05$ ), but similar in controls and HAART-treated patients (data not shown). The frequency of T-cells expressing CD25 showed similar trends, and GALT T-cells from untreated patients exhibited the highest expression (Fig. 1B,  $p<0.05$ ). The frequency of CD25<sup>+</sup> T-cells in PMBC was similar in all the groups (range 0.7-1.5%;  $p=0.82$ , data not shown).

The frequency of GALT CD4<sup>+</sup> T-cells expressing CTLA-4 was higher in both HIV-1-infected groups compared to controls, and again the untreated group exhibited the highest values (U vs C;  $p<0.05$  and H vs C;  $p<0.001$ ; see Table 2 and representative flow cytometry data shown in Fig. 2A). Untreated patients also exhibited the highest proportion of GALT CD8<sup>+</sup> T-cells expressing CTLA-4 (U vs C;  $p<0.001$  and U vs H;  $p<0.01$ ; Table 2). Expression of CTLA-4 by peripheral blood CD4<sup>+</sup> and CD8<sup>+</sup> T-cells showed a trend similar to that observed in GALT samples (data not shown).

When CTLA-4 levels were compared using mean fluorescence intensities (MFI), untreated patients exhibited higher levels of CTLA-4 in both subsets of GALT T-cells compared to controls ( $p<0.001$ ) and to the HAART-treated group ( $p<0.01$ ; Fig. 2B). In peripheral blood, CTLA-4, MFI in CD4<sup>+</sup> and CD8<sup>+</sup> T-cells showed a trend similar to that of GALT (median MFI: 25, 3 and 2 in U, H and C respectively; both  $p<0.05$ ).

The frequency of GALT CD4<sup>+</sup> T-cells expressing PD-1 was significantly higher in both groups of HIV-1 infected individuals than in controls, (U vs C;  $p<0.05$  and H vs C;  $p<0.01$ ; Table 2;

**Table 1.** Characteristics of healthy controls, HAART treated and untreated patients.

|                                                                     | Healthy Controls (n = 10) | HAART Treated (n = 13) | Untreated (n = 10)              |
|---------------------------------------------------------------------|---------------------------|------------------------|---------------------------------|
| Age (years) <sup>1</sup>                                            | 45 (12)                   | 44 (9)                 | 35 (13)                         |
| % Female/Male                                                       | 50/50                     | 15/85                  | 0/100                           |
| CD4 <sup>+</sup> T cell counts (cell/mm <sup>3</sup> ) <sup>2</sup> | 905 (691–1093)            | 464 (301–1055)         | 337** (245–677)                 |
| CD8 <sup>+</sup> T cell counts (cell/mm <sup>3</sup> ) <sup>2</sup> | 457 (310–618)             | 1127** (804–1605)      | 1451*** (696–2038)              |
| Viral load (copies/ml) <sup>2</sup>                                 | N/A                       | 40 (40–223)            | 4943 <sup>0</sup> (19119–88631) |

<sup>1</sup>: results are expressed as mean (SE);

<sup>2</sup>: results are expressed as median (25th–75th percentiles). Groups were compared by the Kruskal-Wallis test and the Dunns multiple comparison post-test. Significant differences are indicated by

\*\* $p<0.01$ ,

\*\*\* $p<0.001$ . HIV-1 positive patients were compared by U Mann Whitney test  $p<0.001$ . N/A: not applicable.

doi:10.1371/journal.pone.0030307.t001

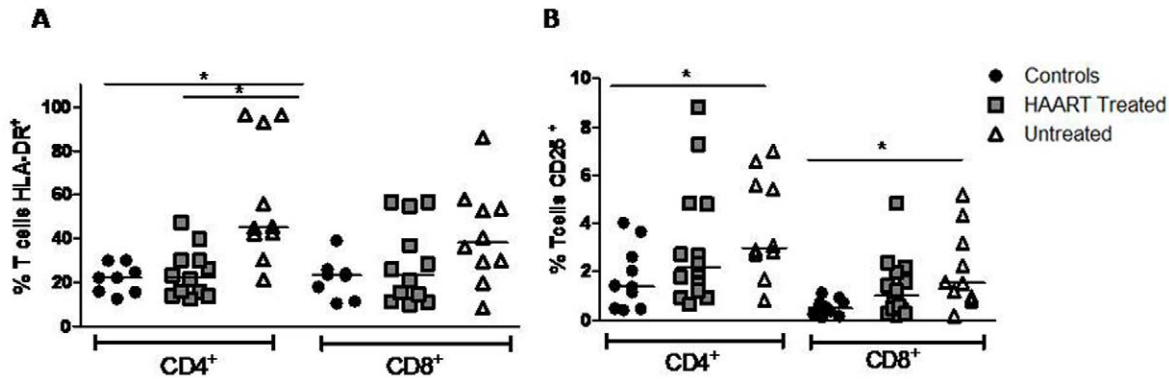

**Figure 1. HIV-1 infected patients exhibit higher frequency of activation markers on rectal tissues.** Phenotypic characterization of GALT cells from healthy controls, HIV+ HAART-treated and untreated patients. A) Dot blot figures show the frequency of HLA-DR<sup>+</sup>, and B) CD25<sup>+</sup> on CD4<sup>+</sup> (left panel) and CD8<sup>+</sup> (right panel) T-cells. Each bar represents the median of the data. Groups were compared by the Kruskal Wallis test and Dunn's multiple comparisons post-test. Significant differences are indicated by \**p*<0.05, \*\**p*<0.01, \*\*\**p*<0001. doi:10.1371/journal.pone.0030307.g001

a representative example of staining is shown in Fig. 3A). The frequency of GALT CD8<sup>+</sup>PD-1<sup>+</sup> T cells was also significantly higher in HAART naïve compared to control cells (U vs C; *p*<0.001; Table 2). In contrast, in peripheral blood, the frequency of CD4<sup>+</sup> (range 2.6–4.9%) and CD8<sup>+</sup> (range 2.1–2.5) T-cells expressing PD-1 was similar among the groups (data not shown).

Since the levels of PD-1 per cell, rather than the percentage of cells expressing PD-1, has been shown to correlate with T-cell exhaustion [11,15], the PD-1 MFI was determined in all compartments. PD-1 MFI in both GALT T-cell subsets was higher in patients with higher viral load than in controls (*p*<0.001) or treated patients (*p*<0.01; Fig. 3A and 3B). Similar data were found for PD-1 MFI in peripheral blood T-cells (median MFI: 16, 4.5 and 3.5 for U, H and C, respectively; both *p*<0.01). To evaluate the strength of the association between the T-cell phenotype and viral load, correlations were examined in patients with detectable viral load. Interestingly, the CTLA-4 MFI in CD4<sup>+</sup> and CD8<sup>+</sup> T-cells from PBMC and GALT was positively correlated with viral load (Fig. 4A and 4B). Similarly, the PD-1 MFI in CD4<sup>+</sup> T cells from the blood and GALT was positively correlated with viral load (Fig. 4C). Similarly, a positive correlation between the viral load and %CD8<sup>+</sup>PD-1<sup>+</sup> (*r* = 0.53; *p* = 0.0008), %CD4<sup>+</sup>CTLA-4<sup>+</sup> (*r* = 0.62; *p* = 0.0016) and %CD8<sup>+</sup>CTLA-4<sup>+</sup> (*r* = 0.66; *p* = 0.0005) on GALT was also observed. In contrast, no significant relationships for VL and % PD-1/CTLA-4 T cells in peripheral blood were seen.

**Decreased expression of granzyme A by GALT CD8<sup>+</sup> T cells from untreated patients**

Granzyme A, a molecule associated with cytotoxic function, has been shown to correlate with CD8 protective function [16]. The frequency of granzyme A<sup>+</sup> CD8<sup>+</sup> T-cells was significantly lower in PBMC (data not shown) and GALT from HAART naïve group than in controls (Fig. 5A and 5B). Interestingly, normal frequency of CD8<sup>+</sup> granzyme A<sup>+</sup> T-cells was observed in three untreated individuals, who also exhibited the lowest viral load within this group (<20,000 copies/ml). In fact, the frequency of CD8<sup>+</sup> granzyme A<sup>+</sup> T cells in blood or GALT was inversely correlated with viral load (Fig. 5C).

**Treg subsets are altered in GALT and blood of untreated patients**

Finally, to evaluate the potential variations of the CD4<sup>+</sup> T-cell subpopulations in GALT, the mRNA expression of transcription factors specific for Th1 (T-bet), Th2 (GATA-3), regulatory T-cells (Treg; Foxp3), and for Th17 (ROR-γt) cells was measured. mRNA Foxp3 expression in GALT was significantly increased in untreated HIV-1-infected patients compared to HAART-treated subjects and controls (U vs H; *p*<0.05 and U vs C; *p*<0.05; Table 3). Expression of the other transcription factors was similar among the groups (Table 3). Changes in Foxp3 expression led to changes in the Foxp3/ROR-γt mRNA ratio, which was significantly higher in the GALT of untreated patients compared

**Table 2. Frequency of CTLA-4<sup>+</sup> and PD-1<sup>+</sup> in T cells from GALT of healthy controls, HAART treated and untreated patients.**

| Frequency of T-cells                | Healthy Controls   | HAART Treated        | Untreated              |
|-------------------------------------|--------------------|----------------------|------------------------|
| %CD4 <sup>+</sup> CTLA <sup>+</sup> | 4.74 (3.43–5.86)   | 12.74* (5.53–20.61)  | 28.07*** (19.76–44.16) |
| %CD8 <sup>+</sup> CTLA <sup>+</sup> | 1.07 (0.36–1.92)   | 1.51 (1.26–2.28)     | 5.33*** ++ (2.80–9.73) |
| %CD4 <sup>+</sup> PD-1 <sup>+</sup> | 7.75 (5.61–11.01)  | 19.38* (10.11–33.87) | 36.13** (15.33–48.83)  |
| %CD8 <sup>+</sup> PD-1 <sup>+</sup> | 11.17 (2.95–14.85) | 9.05 (3.18–16.18)    | 23.97*** (10.02–41.86) |

The data are shown as median (25th percentile–75th percentile). Groups were compared by the Kruskal-Wallis test and the Dunns multiple comparison post-test.

Significant differences are indicated by

\**p*<0.05,

\*\**p*<0.01,

\*\*\**p*<0.001 compared to controls and

++*p*<0.01 compared with HAART treated group.

doi:10.1371/journal.pone.0030307.t002

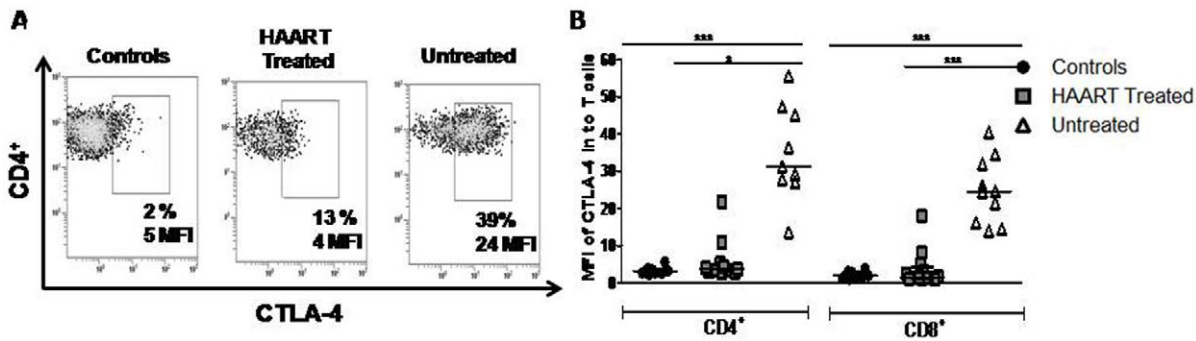

**Figure 2. T-cells from untreated infected patients exhibit elevated expression of CTLA-4 in rectal tissues.** A) Flow cytometry data from one representative experiment with GALT samples from healthy controls, HIV+ treated and untreated patients are shown. Percentage of CD4<sup>+</sup>CTLA-4<sup>+</sup> cells and MFI is indicated in each panel. B) MFI of CTLA-4 on CD4<sup>+</sup> (left panel) and CD8<sup>+</sup> (right panel) T-cells from GALT. doi:10.1371/journal.pone.0030307.g002

to controls and treated patients (both  $p < 0.05$ ; Fig. 6A). HAART normalized this ratio, both in the GALT (Fig. 6A) and PBMC (not shown). In addition, the GALT Foxp3/ROR- $\gamma$ t ratio was positively correlated with viral load ( $r = 0.472$ ,  $p = 0.035$ ).

To corroborate our data, the expression of Foxp3 protein in CD4<sup>+</sup> T cells was determined by flow cytometry in biopsies of three individuals per group. As shown in the representative figure 6B, the frequency of Treg (CD4<sup>+</sup>Foxp3<sup>+</sup>) was increased in untreated patients compared to controls (U: 22,21% vs C: 8.26% ;  $p < 0.05$ ) (data not shown). To rule out the possibility that the increase of Foxp3 was due to cell activation rather than an increase in Treg frequency, additional markers associated with Treg cell phenotype were evaluated. The CD4<sup>+</sup>Foxp3<sup>+</sup> cells were also CD25<sup>+</sup> and CD127<sup>Low/-</sup> (data not shown). Moreover, the Treg/CD4<sup>+</sup> ratio in controls, HAART treated and untreated patients was 1.01 (0.66–2.59), 3.89 (3.29–6.27) and 5.26 (3.48–9.32) respectively. This ratio was significantly higher in untreated patients compared with controls (U vs C;  $p < 0.05$ ). Although not significant, in HAART treated patients the Treg frequency (14.32%) and Treg/CD4<sup>+</sup> ratio were also increased. Unfortunately, it was not possible to detect IL-17 protein by flow cytometry.

**Discussion**

The GALT is an organ continually exposed to food and microbial antigens, conditions that promote distinct functional responses and phenotype of gut lymphocytes. During acute HIV-1

infection, viral replication induces severe immune and structural damages in GALT, affecting the gut mucosal barrier, promoting translocation of different microbial components to the systemic circulation, which is considered as one of the main mechanisms underlying chronic immune activation [17]. Since the pathophysiological findings that occur during HIV-1 infection have been mainly characterized in circulating immune cells, we focused our study on GALT T-cells. As previously reported [12,18], both the proportion and the absolute numbers of CD4<sup>+</sup> T cells decreased in the peripheral blood and GALT of HIV-1+ patients, including in HAART-treated patients. This finding could be explained by incomplete viral suppression in GALT [19], but it could be also associated with the immune hyper-activation state exhibited by HIV-1 infected individuals [20,21].

T-cell chronic activation induced by antigen persistence can result in a functional unresponsive phenotype, known as immune exhaustion [22]. This state is characterized by the loss of effector functions such as proliferation, cytokine secretion and cytotoxic activity [10,22,23]. T-cell exhaustion is observed during HIV-1 infection; and previous reports have shown higher levels of CTLA-4 or PD-1 (protein or mRNA) on circulating CD4<sup>+</sup> and CD8<sup>+</sup> T-cells from HIV-1 infected patients, compared to uninfected individuals [10,14,24]. Here, we show that GALT CD4<sup>+</sup> and CD8<sup>+</sup> T cells generally expressed higher expression of molecules associated with exhaustion than peripheral T- cells, but this upregulation was particularly striking in HIV-infected individuals. Indeed, the frequency of PD-1 and CTLA-4-expressing T-cells

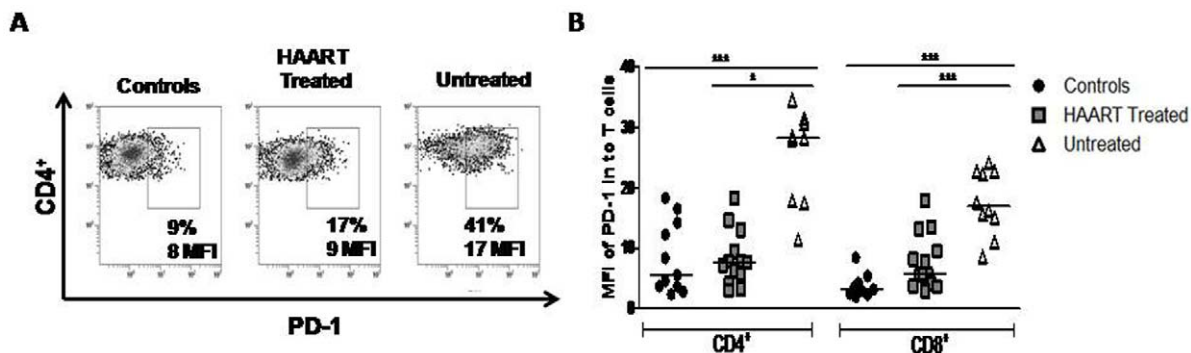

**Figure 3. T-cells from untreated patients exhibit elevated expression of PD-1 in rectal tissues.** A) Flow cytometry data from one representative experiment with GALT samples from healthy controls, HIV+ HAART-treated and untreated patients are shown. Percentage of CD4<sup>+</sup>PD-1<sup>+</sup> cells and MFI is indicated in each panel. B) MFI of PD-1 in CD4<sup>+</sup> (left panel) and CD8<sup>+</sup> (right panel) T-cells from GALT. doi:10.1371/journal.pone.0030307.g003

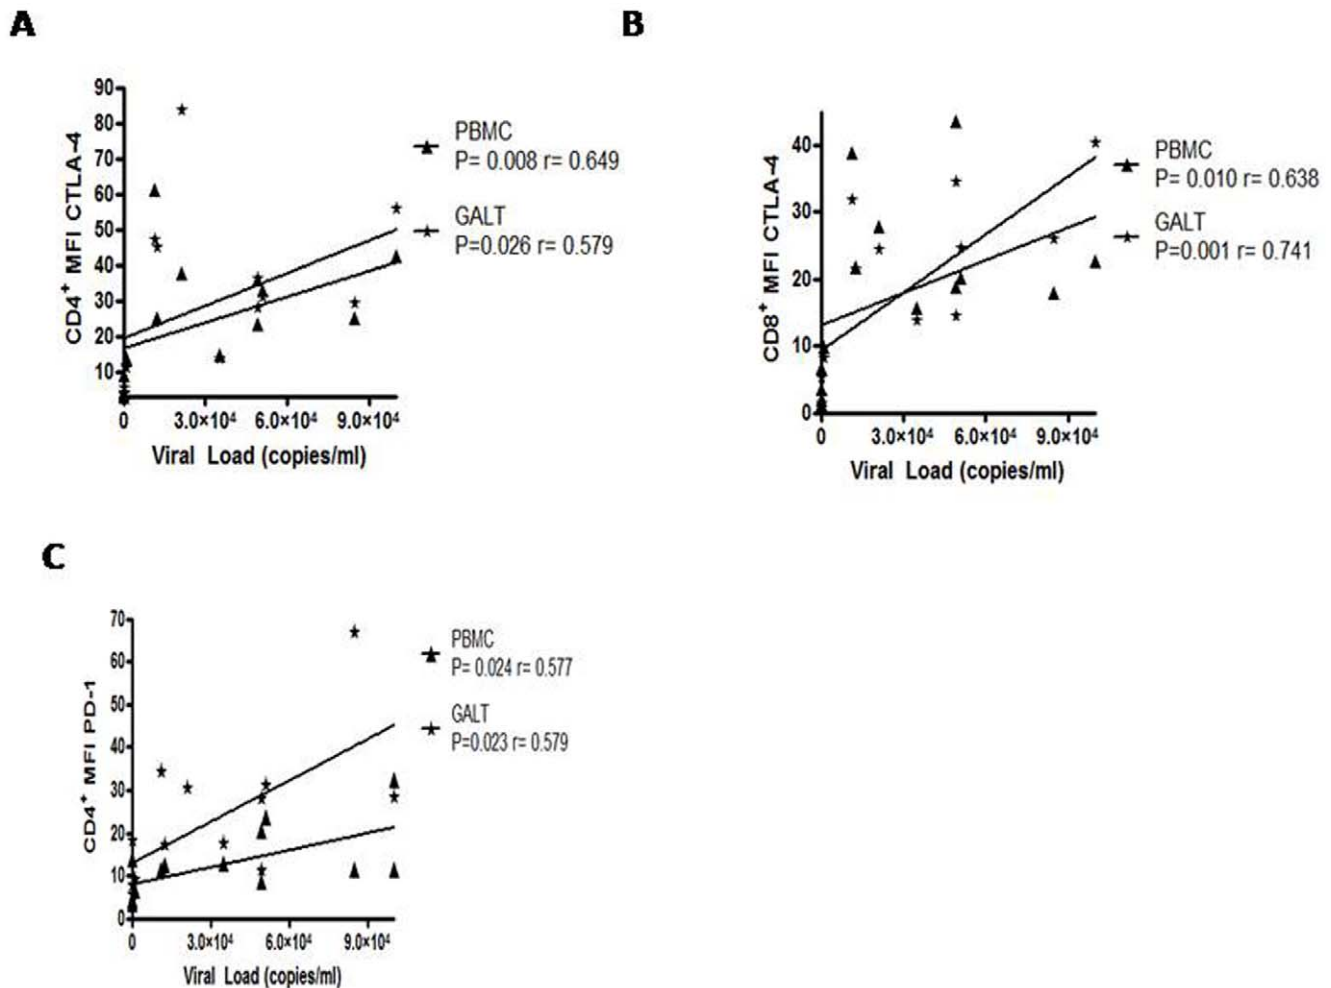

**Figure 4. Phenotypic alterations in T-cells are modulated by HIV-1 viral load.** Spearman correlation between plasma viral load and phenotype of T cells from PBMC and GALT. Positive correlation between plasma viral load and CTLA-4 expression. A) In CD4<sup>+</sup> and B) CD8<sup>+</sup> T cells. C) Positive correlation between viral load and PD-1 expression on CD4<sup>+</sup> T cells. doi:10.1371/journal.pone.0030307.g004

was about two-fold higher in GALT than PMBC in controls and four-fold higher in HIV-1-infected individuals, even after treatment. Several mechanisms could explain these findings: i) breakdown of the gastrointestinal mucosal barrier lead to translocation of luminal lipopolysaccharide (LPS) and bacterial DNA, triggering a sustained immune activation [17,25], and ii) persistent exposure to HIV antigens drive this activation, which could be particularly intense in the main sites of HIV replication such as the GALT [22]. The second mechanism may be the most important, as HIV-1- or SIV-specific CD8<sup>+</sup> T-cells are those expressing the highest levels of PD-1 [26,27]. Our data also supports such hypothesis as high frequencies of mucosal CD4<sup>+</sup> and CD8<sup>+</sup> T-cells expressing CTLA-4 or PD-1 were detected in HIV-1-infected patients with or without control of viral replication compared to those seen in uninfected controls. Expression levels of these molecules were also significantly higher in untreated patients. Moreover, viral load was correlated with the expression of the inhibitory molecules CTLA-4 and PD-1, suggesting a vicious cycle where HIV-1 and immune alterations persist during the chronic phase of infection.

Interestingly, the expression of PD-1 and CTLA-4 was always higher in CD4<sup>+</sup> than in CD8<sup>+</sup> T-cells, suggesting the existence of

additional mechanisms inducing these molecules in CD4<sup>+</sup> T-cells. These could include interactions with HIV-1-exposed dendritic cells (DCs) or direct signaling by the HIV-1 Env proteins as both pathways have been shown to induce PD-1 or CTLA-4 expression [14,28]. Alternatively, the protein Nef induces PD-1 in HIV-1-infected CD4<sup>+</sup> T-cells [29].

Similarly to a previous report [30], a strikingly low level of granzyme A expression by peripheral and GALT CD8<sup>+</sup> T-cells from HIV-1-infected patients was observed, particularly in untreated patients. In contrast, other studies have reported an increased expression of granzyme A by HIV-specific CD8<sup>+</sup> T-cells in lymphoid tissues such as tonsils, lymph nodes and GALT from untreated patients [16,31,32]. One possible explanation for this apparent contradiction is the fact that the later studies recruited only individuals expressing the HLA A\*0201 allele, which is associated with natural resistance to HIV-1 infection and slow progression [33]. HAART partially normalized defective granzyme expression, since the frequency of CD8<sup>+</sup> T-cells expressing granzyme A was not significantly different in treated patients and uninfected controls.

To further explore the cytokine profiles during HIV-1 infection, we measured the expression of the transcription factors reported to

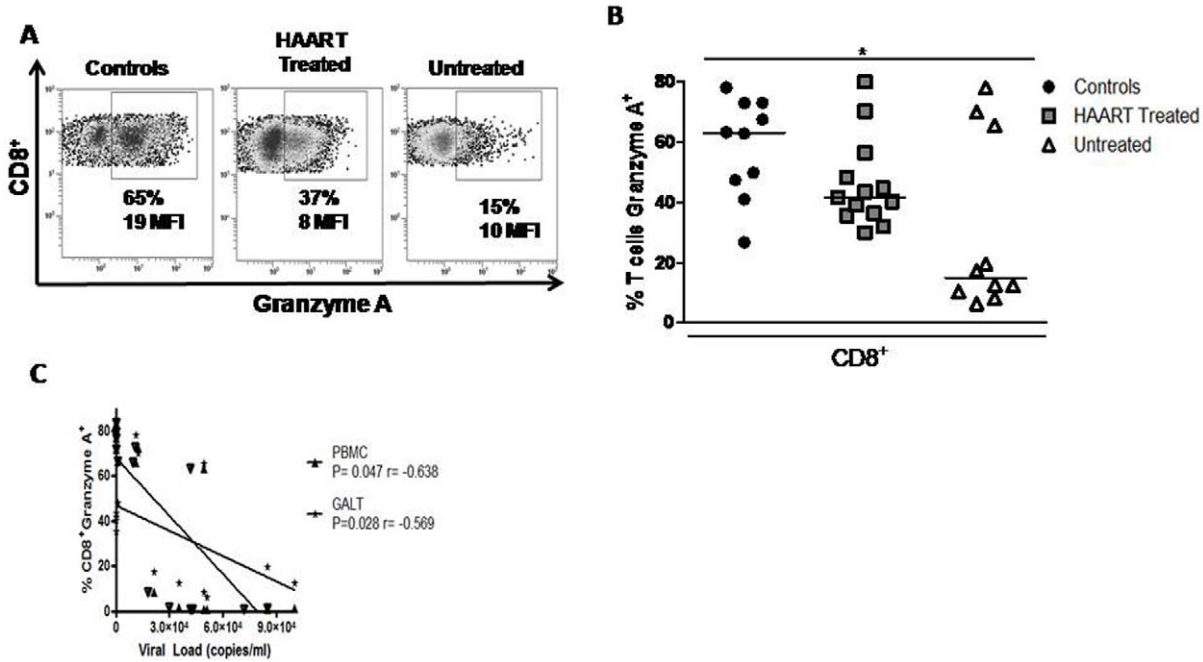

**Figure 5. Decreased expression of granzyme A by CD8<sup>+</sup> T cells in GALT from untreated patients.** A) Flow cytometry data from one representative experiment shows the frequency of CD8<sup>+</sup> granzyme A<sup>+</sup> from healthy controls, HAART-treated and untreated patients. B) Frequency of total participants of CD8<sup>+</sup> granzyme A<sup>+</sup> in GALT. C) Frequency of CD8<sup>+</sup> granzyme A<sup>+</sup> T-cells was inversely correlated with viral load. doi:10.1371/journal.pone.0030307.g005

be associated with different T-cell lineages, i.e. T-bet, GATA-3, Foxp3 and ROR- $\gamma$ t that are expressed by Th1, Th2, Treg and Th17 respectively. In most cases, a GALT Th17 response has been associated with lower pathogenicity [34]. In contrast to another study [35], we did not observe a decrease in Th17 expression in the GALT of HIV-infected patients. This difference may have resulted from the low number of subjects enrolled in our study and/or methodological differences, since the previous report [35] evaluated the expression of IL-17 protein and we quantified ROR- $\gamma$ t mRNA. One limitation of our approach is that it does not allow analyzing the plasticity of the Treg and Th17 subsets, the simultaneous expression of Foxp3 and ROR- $\gamma$ t molecules in some cells [36,37]. Treg activation in presence of proinflammatory cytokines induce the production of IL-17 [36,37]; therefore we cannot rule out the possibility that the similar ROR- $\gamma$ t expression in patients and controls is due to the increased frequency of Treg exhibiting an intermediate differentiation profile (CD4<sup>+</sup>CD25<sup>Hi</sup>-Foxp3<sup>+</sup>ROR- $\gamma$ t<sup>+</sup>) in the HIV-infected groups. This subpopulation has not yet been reported in HIV-infected patients, and this would deserve further investigation.

A higher Treg frequency was found in lymphoid tissues and peripheral blood of HIV-1-infected patients, which was correlated with disease progression in chronically infected patients [13,14,38]. We found a change in the Foxp3/ROR- $\gamma$ t balance in PBMC and GALT from the untreated patients, which was due to increased Foxp3 RNA levels. Increased Foxp3 expression was confirmed by flow cytometry. This result is in agreement with previous reports [13,39], and supports the hypothesis that HIV-1 infection favors the Treg lineage. Mechanisms underlying such changes are not well established, but could include Treg expansion, migration, increased survival following CD4-gp120 interaction and/or peripheral non-Treg conversion, particularly in the GALT [13,14]. Of note, PD-1 and CTLA-4 expression inhibit IL-2 and IFN- $\gamma$  production but increase the enzyme indoleamine 2,3-dioxygenase (IDO) expression by DC [40,41,42], conditions that would favor Treg polarization [13,43,44,45]. Further studies are required to determine whether mucosal Treg are functional. Of interest, Shaw et al recently showed accumulation of highly activated Treg in rectal mucosal tissues, and that these cells were suppressive [46].

**Table 3. Expression of transcription factors in gastrointestinal tissue of controls, HAART treated and untreated patients.**

| Transcription factor | Healthy Controls     | HAART Treated        | Untreated                         |
|----------------------|----------------------|----------------------|-----------------------------------|
| Foxp3                | 0.006 (0.002–0.010)  | 0.005 (0.003–0.010)  | 0.029* <sup>Φ</sup> (0.028–2.153) |
| ROR- $\gamma$ t      | 0.147 (0.070–0.325)  | 0.136 (0.0957–0.178) | 0.166 (0.079–0.188)               |
| T-bet                | 0.008 (0.005–0.0152) | 0.009 (0.005–0.014)  | 0.027 (0.002–0.490)               |
| GATA-3               | 0.129 (0.069–0.445)  | 0.160 (0.122–0.275)  | 0.034 (0.013–0.577)               |

Data are expressed as relative units after normalization on UB2D2 expression. Median (25th–75th percentiles) are shown for each transcription factors. Groups were compared by the Kruskal–Wallis test and the Dunns multiple comparison post-test. Significant differences are indicated by \* <sup>Φ</sup> p<0.05 among untreated and controls (\*) and HAART treated (<sup>Φ</sup>).

doi:10.1371/journal.pone.0030307.t003

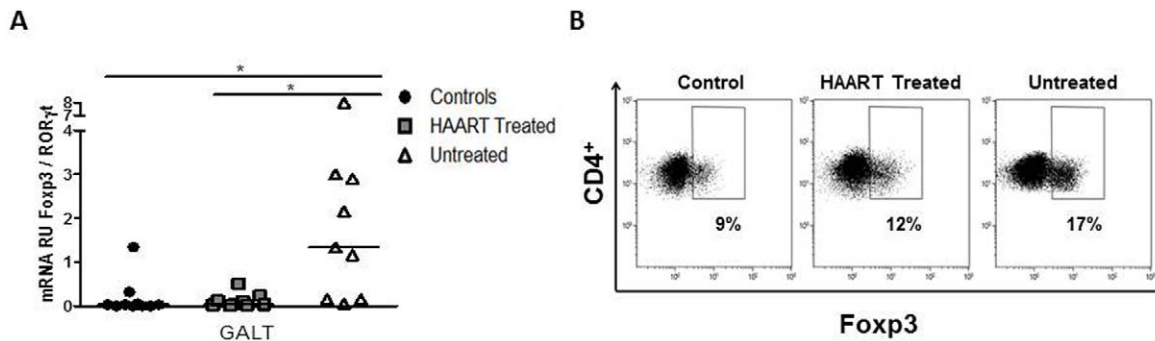

**Figure 6. Alteration of the expression of Foxp3 and ROR- $\gamma$ t ratio in cells from untreated patients.** A) Relative units (RU) of ROR- $\gamma$ t and Foxp3 mRNAs were measured by qRT-PCR. Whisker boxes figures show the ratio of RU of Foxp3/ROR- $\gamma$ t in GALT from healthy controls, HAART-treated and untreated patients. B) Flow cytometry data from one representative experiment show the expression of Foxp3 on CD4<sup>+</sup> T cells in healthy controls, HAART-treated and untreated patients. doi:10.1371/journal.pone.0030307.g006

Increased Treg frequency could thus be considered, along with increased frequency of activated T cells, as a predictive value for disease progression. However, although Treg appear fully functional during HIV infection, as evidenced in suppressive assays performed ex vivo [46,47,48,49], they are not able to control excessive immune activation [39]. These data could be explained by a so-far unrecognized deficit in Treg functionality. Alternatively, it is possible that Treg frequency increases over time to quell this ongoing inflammation [50], but is able to control it, not abolish it. Interestingly, similar dynamic appears to play in aging, in which increased frequency of functional Treg [51] does not completely control the pro-inflammatory environment (the "inflamm-aging") [52,53]. Future studies will be needed to clarify this important issue.

In conclusion, our results suggest that expression of activation/exhaustion markers by T cells is increased during HIV-1 infection, particularly in the GALT, and is associated with increased polarization towards a regulatory profile. These alterations are not completely restored by HAART. Our findings thus imply that other therapeutic strategies besides HAART will be necessary in order to restore functional immune responses in the GALT of HIV-infected patients.

## Materials and Methods

### Subjects and sample collection

Three groups of subjects, living in the metropolitan area from Medellin-Colombia, were included in the study: healthy controls (C, n = 10), chronic HIV-1-infected patients on HAART treatment (H, n = 13), and untreated (U n = 10) chronic HIV-1-infected patients with viremia greater than 10,000 copies/ml. All the patients have at least one year of HIV confirmed diagnosis.

The demographic and clinical characteristics of these individuals are shown in Table 1. Absolute CD4<sup>+</sup> T-cell numbers were calculated in whole blood samples. Plasma HIV-1 RNA levels were assessed by RT-PCRq (COBAS AmpliPrep/COBAS Taq-Man). All individuals signed an informed consent approved by the Bioethical Board for Human Research of the University of Antioquia, prepared according to the Colombian legislation (Resolution 008430, 1993).

### Isolation of cells from peripheral blood and GALT

Peripheral blood mononuclear cells (PBMC) were obtained from 10 ml of heparin venous blood samples by centrifugation on Histopaque (Sigma-Aldrich, St Louis, MO, USA) for 30 min at

400 x g. Rectal tissue was obtained by rectosigmoidoscopy from the rectum at 10 cm from the anal verge. A flexible sigmoidoscope with a single endoscopy biopsy forcep FB-24K-1 (Olimpus America Corp, Melville, NY, USA) was used. At each procedure, 20 tissue samples of ~3 mm were obtained. Samples were processed by digestion using collagenase type II from *Clostridium histolyticum* (Sigma) at 0.5 mg/ml diluted in RPMI 1640 and 7.5% FCS (fetal calf serum) (penicillin 100 U/ml, streptomycin 100  $\mu$ g/ml, amphotericin B 0.25  $\mu$ g/ml) (Gibco-BRL; Grand Island, NY, USA), during 30 min at 37°C while shaking. After collagenase digestion, biopsy fragments were further disrupted by repeated passage through a 30 ml syringe with a blunt ended 16 gauge needle (Stem Cell Technologies, Vancouver, BC). Rectal cells (RC) were isolated from the fragments by passage through a nylon strainer of 70  $\mu$ m (Falcon, Lincoln Park, NJ, USA). PBMC and RC were washed with Dulbecco's PBS (DPBS) (Sigma-Aldrich; St Louis, MO, USA) to remove excess histopaque and collagenase.

### Antibodies

The following anti-human monoclonal antibodies were used: anti-CD4-ECD (clone SFC112T4D11) (Beckman Coulter Fullerton, CA, USA); anti-CD3-PE-CY7 (clone UCHT1); anti-HLA-DR-PE (clone LN3); anti-CD25-PE-CY5 (clone BC96); anti-PD-1-PE (CD 279, clone MIH4), anti-Foxp3-FITC (clone PCH101) (e-Bioscience; San Diego, CA, USA); anti-CD3-FITC (clone UCHT1); anti-CD4-PE-Cy5 (RPA-T4); anti-CD8-PE (RPA-T8); anti-CTLA-4 PE (CD 152, clone BNI3) and anti-Granzyme A-PE (clone MOPC-21) (BD Pharmingen; San Diego, CA, USA). Appropriate isotype controls were used for each antibody.

### Flow cytometric analysis of whole blood and isolated rectal cells

For CD4<sup>+</sup> T cell count, 100  $\mu$ l of whole blood samples were incubated for 30 min at 4°C with anti-CD3, anti-CD4 and anti-CD8 monoclonal antibodies; red blood cells were eliminated by lysis buffer (BD Biosciences) and washed twice with DPBS before analysis by flow cytometry.

PBMC and RC were treated with 20  $\mu$ g/ml of human IgG (Sigma) to block Fc receptors, and stained on the surface with anti-CD3, -CD4, -CD25 or -PD-1 for 30 min at 4°C. The cells were washed with DPBS, then fixed/permeabilized (Foxp3 staining buffer kit, e-Bioscience) and stained intracellularly using monoclonal antibodies against CTLA-4, Foxp3 or granzyme A for 30 min at 4°C. Also, the expression of activation markers such as HLA-DR and CD38 was evaluated on whole blood samples using

specific monoclonal antibodies. At least 100,000 events were acquired for each sample on the lymphocyte region, using the flow cytometry FC500 (Beckman Coulter) and analyzed using the Kaluza Software (Beckman Coulter). T-cells were gated first based on forward- and side-scatter properties, then as CD3<sup>+</sup>CD4<sup>+</sup> and CD3<sup>+</sup>CD8<sup>+</sup> cells. To define the limit of the positive gate, a CD3<sup>-</sup> population was used as negative reference; the MFI was analyzed in the positive population.

### Foxp3, ROR- $\gamma$ t, T-bet and GATA-3 mRNA expression

Rectal biopsies were placed in RNAlater (Qiagen, Inc., Valencia, CA, USA) and stored at  $-70^{\circ}\text{C}$  for subsequent RNA extraction. RNA was isolated with the quiazol reagent (Invitrogen Corp., Carlsbad, CA, USA); 1  $\mu\text{g}$  of RNA was used for complementary DNA (cDNA) synthesis with RT-PCR using oligo (dT) and random hexamers by the SuperScriptIII single stranded cDNA synthesis kit (Invitrogen). The cDNA obtained was diluted 1:3 and used in quantitative RT-PCR reactions using SYBER Green (qPCR Master Mix kit, Fermentas Life Sciences, Hanover, MD, USA) with the following primers: Foxp3 (Forward: 5-CAGCACATTCCCAGAGTTCCTC-3; Reverse: 5-GCGTGTGACACCAGTGGTAGATC-3); ROR $\gamma$ t (Forward: 5-TTTTCCGAGGATGAGATTGC-3; Reverse: 5-CTTCCACATGCTGGCTACA-3); T-bet (Forward: 5-GCCTACAGAATGCCGAGATTACT-3; Reverse: 5-GGATGC TGGTGTCAACAGATG-3), and GATA-3 (Forward: 5-GCG GGCTCTATCACAAATGA-3; Reverse: 5-GCTCTCCTGGCTGCAGACAGC-3 (Integrated DNA Technologies (IDT) Coralville, IA, USA) [54]. Expression levels were normalized by  $\Delta\text{ct}$  using ubiquitin-

conjugating enzyme (UBE2D2) as housekeeping gene [55] (Forward: 5-AGCTACAATAATGGGGCCAA-3; Reverse: 5-TGAAGGGGTAATCTGTTGGG-3) (IDT) and expressed such as relative units (RU).

### Statistical Analysis

Statistical analyses were done using GraphPad Prism 5 (San Diego, CA, USA). Comparisons of medians among groups were performed by the Wilcoxon or Kruskal-Wallis test and Dunns post-test. Correlation was made with spearman test,  $p$  values lower than 0.05 were considered statistically significant.

### Acknowledgments

The authors thank “Grupo de Vida” foundation for facilitating patient recruitment. We also acknowledge patients and volunteers who kindly participated in this study. To the health personnel of the Clinical Bolivariana, Medellin (Carlos Morales, Joaquin Valencia, Nelson Ramirez, and Zulma Molina), who carried-out the rectosigmoidoscopies. To Barbara Shacklett from the Dept. of Medical Microbiology and Immunology, School of Medicine, University of California Davis, who shared the protocol for the GALT biopsies. To Anne-Lise Haenni, who reviewed the manuscript.

### Author Contributions

Conceived and designed the experiments: CMR PAV MTR. Performed the experiments: CMR. Analyzed the data: CMR. Wrote the paper: CMR PAV MTR. Collaborated in patient's recruitment and provided comments on the manuscript: CJM. Helped interpret the data and critically evaluate the manuscript: CAC.

### References

- Mehandru S, Poles MA, Tenner-Racz K, Horowitz A, Hurley A, et al. (2004) Primary HIV-1 infection is associated with preferential depletion of CD4<sup>+</sup> T lymphocytes from effector sites in the gastrointestinal tract. *J Exp Med* 200: 761–770.
- Brenchley JM, Schacker TW, Ruff LE, Price DA, Taylor JH, et al. (2004) CD4<sup>+</sup> T cell depletion during all stages of HIV disease occurs predominantly in the gastrointestinal tract. *J Exp Med* 200: 749–759.
- Cassol E, Malfeld S, Mahasha P, van der Merwe S, Cassol S, et al. (2010) Persistent microbial translocation and immune activation in HIV-1-infected South Africans receiving combination antiretroviral therapy. *J Infect Dis* 202: 723–733.
- Nowroozalazadeh S, Mansson F, da Silva Z, Repits J, Dabo B, et al. (2010) Microbial translocation correlates with the severity of both HIV-1 and HIV-2 infections. *J Infect Dis* 201: 1150–1154.
- Brenchley JM, Price DA, Douek DC (2006) HIV disease: fallout from a mucosal catastrophe? *Nat Immunol* 7: 235–239.
- Grossman Z, Meier-Schellersheim M, Paul WE, Picker LJ (2006) Pathogenesis of HIV infection: what the virus spares is as important as what it destroys. *Nat Med* 12: 289–295.
- Aiuti F, Mezzaroma I (2006) Failure to reconstitute CD4<sup>+</sup> T-cells despite suppression of HIV replication under HAART. *AIDS Rev* 8: 88–97.
- Jansen CA, De Cuyper IM, Steingrover R, Jurriaans S, Sankatsing SU, et al. (2005) Analysis of the effect of highly active antiretroviral therapy during acute HIV-1 infection on HIV-specific CD4<sup>+</sup> T cell functions. *Aids* 19: 1145–1154.
- Eggena MP, Barugahare B, Okello M, Mutyalu S, Jones N, et al. (2005) T cell activation in HIV-seropositive Ugandans: differential associations with viral load, CD4<sup>+</sup> T cell depletion, and coinfection. *J Infect Dis* 191: 694–701.
- Kaufmann DE, Kavanagh DG, Pereyra F, Zaunders JJ, Mackey EW, et al. (2007) Upregulation of CTLA-4 by HIV-specific CD4<sup>+</sup> T cells correlates with disease progression and defines a reversible immune dysfunction. *Nat Immunol* 8: 1246–1254.
- Barber DL, Wherry EJ, Masopust D, Zhu B, Allison JP, et al. (2006) Restoring function in exhausted CD8 T cells during chronic viral infection. *Nature* 439: 682–687.
- Guadalupe M, Reay E, Sankaran S, Prindiville T, Flamm J, et al. (2003) Severe CD4<sup>+</sup> T-cell depletion in gut lymphoid tissue during primary human immunodeficiency virus type 1 infection and substantial delay in restoration following highly active antiretroviral therapy. *J Virol* 77: 11708–11717.
- Favre D, Mold J, Hunt PW, Kanwar B, Loke P, et al. (2010) Tryptophan catabolism by indoleamine 2,3-dioxygenase 1 alters the balance of Th17 to regulatory T cells in HIV disease. *Sci Transl Med* 2: 32ra36.
- Nilsson J, Boasso A, Velilla PA, Zhang R, Vaccari M, et al. (2006) HIV-1-driven regulatory T-cell accumulation in lymphoid tissues is associated with disease progression in HIV/AIDS. *Blood* 108: 3808–3817.
- Sauce D, Almeida JR, Larsen M, Haro L, Autran B, et al. (2007) PD-1 expression on human CD8 T cells depends on both state of differentiation and activation status. *Aids* 21: 2005–2013.
- Shacklett BL, Cox CA, Quigley MF, Kreis C, Stollman NH, et al. (2004) Abundant expression of granzyme A, but not perforin, in granules of CD8<sup>+</sup> T cells in GALT: implications for immune control of HIV-1 infection. *J Immunol* 173: 641–648.
- Jiang W, Lederman MM, Hunt P, Sieg SF, Haley K, et al. (2009) Plasma levels of bacterial DNA correlate with immune activation and the magnitude of immune restoration in persons with antiretroviral-treated HIV infection. *J Infect Dis* 199: 1177–1185.
- Kelley CF, Kitchen CM, Hunt PW, Rodriguez B, Hecht FM, et al. (2009) Incomplete peripheral CD4<sup>+</sup> cell count restoration in HIV-infected patients receiving long-term antiretroviral treatment. *Clin Infect Dis* 48: 787–794.
- Guadalupe M, Sankaran S, George MD, Reay E, Verhoeven D, et al. (2006) Viral suppression and immune restoration in the gastrointestinal mucosa of human immunodeficiency virus type 1-infected patients initiating therapy during primary or chronic infection. *J Virol* 80: 8236–8247.
- Stylianou E, Aukrust P, Bendtzen K, Muller F, Froland SS (2000) Interferons and interferon (IFN)-inducible protein 10 during highly active anti-retroviral therapy (HAART)-possible immunosuppressive role of IFN-alpha in HIV infection. *Clin Exp Immunol* 119: 479–485.
- Hunt PW, Martin JN, Sinclair E, Brecht B, Hagos E, et al. (2003) T cell activation is associated with lower CD4<sup>+</sup> T cell gains in human immunodeficiency virus-infected patients with sustained viral suppression during antiretroviral therapy. *J Infect Dis* 187: 1534–1543.
- Khaitan A, Unutmaz D (2011) Revisiting immune exhaustion during HIV infection. *Curr HIV/AIDS Rep* 8: 4–11.
- Kaufmann DE, Walker BD (2009) PD-1 and CTLA-4 inhibitory cosignaling pathways in HIV infection and the potential for therapeutic intervention. *J Immunol* 182: 5891–5897.
- D'Souza M, Fontenot AP, Mack DG, Lozupone C, Dillon S, et al. (2007) Programmed death 1 expression on HIV-specific CD4<sup>+</sup> T cells is driven by viral replication and associated with T cell dysfunction. *J Immunol* 179: 1979–1987.
- Marchetti G, Bellistri GM, Borghi E, Tinca C, Ferramosca S, et al. (2008) Microbial translocation is associated with sustained failure in CD4<sup>+</sup> T-cell reconstitution in HIV-infected patients on long-term highly active antiretroviral therapy. *Aids* 22: 2035–2038.



26. Petrovas C, Price DA, Mattapallil J, Ambrozak DR, Geldmacher C, et al. (2007) SIV-specific CD8<sup>+</sup> T cells express high levels of PD1 and cytokines but have impaired proliferative capacity in acute and chronic SIVmac251 infection. *Blood* 110: 928–936.
27. Day CL, Kaufmann DE, Kiepiela P, Brown JA, Moodley ES, et al. (2006) PD-1 expression on HIV-specific T cells is associated with T-cell exhaustion and disease progression. *Nature* 443: 350–354.
28. Che KF, Sabado RL, Shankar EM, Tjomsland V, Messmer D, et al. (2010) HIV-1 impairs in vitro priming of naive T cells and gives rise to contact-dependent suppressor T cells. *Eur J Immunol* 40: 2248–2258.
29. Muthumani K, Choo AY, Shedlock DJ, Laddy DJ, Sundaram SG, et al. (2008) Human immunodeficiency virus type 1 Nef induces programmed death 1 expression through a p38 mitogen-activated protein kinase-dependent mechanism. *J Virol* 82: 11536–11544.
30. Yang OO, Lin H, Dagarag M, Ng HL, Effros RB (2005) Decreased perforin and granzyme B expression in senescent HIV-1-specific cytotoxic T lymphocytes. *Virology* 332: 16–19.
31. Zhang D, Shankar P, Xu Z, Harnisch B, Chen G, et al. (2003) Most antiviral CD8 T cells during chronic viral infection do not express high levels of perforin and are not directly cytotoxic. *Blood* 101: 226–235.
32. Andersson J, Behbahani H, Lieberman J, Connick E, Landay A, et al. (1999) Perforin is not co-expressed with granzyme A within cytotoxic granules in CD8 T lymphocytes present in lymphoid tissue during chronic HIV infection. *Aids* 13: 1295–1303.
33. Levy JA (2009) HIV pathogenesis: 25 years of progress and persistent challenges. *Aids* 23: 147–160.
34. Salgado M, Rallon NI, Rodes B, Lopez M, Soriano V (2011) Long-term non-progressors display a greater number of Th17 cells than HIV-infected typical progressors. *Clin Immunol* 139: 110–114.
35. Chege D, Sheth PM, Kain T, Kim CJ, Kovacs C, et al. (2011) Sigmoid Th17 populations, the HIV latent reservoir, and microbial translocation in men on long-term antiretroviral therapy. *Aids* 25: 741–749.36.
36. Beriou G, Costantino CM, Ashley CW, Yang L, Kuchroo VK, et al. (2009) IL-17-producing human peripheral regulatory T cells retain suppressive function. *Blood* 113: 4240–4249.
37. Koenen HJ, Smeets RL, Vink PM, van Rijssen E, Boots AM (2008) Human CD25<sup>high</sup>Foxp3<sup>pos</sup> regulatory T cells differentiate into IL-17-producing cells. *Blood* 112: 2340–2352.
38. Epple HJ, Loddenkemper C, Kunkel D, Troger H, Maul J, et al. (2006) Mucosal but not peripheral FOXP3<sup>+</sup> regulatory T cells are highly increased in untreated HIV and normalize after suppressive HAART. *Blood* 108: 3072–3078.
39. Brandt L, Benfield T, Mens H, Clausen LN, Katzenstein TL, et al. (2011) Low level of regulatory T cells and maintenance of balance between regulatory T cells and TH17 cells in HIV-1-infected elite controllers. *J Acquir Immune Defic Syndr* 57: 101–1088.
40. Boasso A, Herbeuval JP, Hardy AW, Winkler C (2005) Regulation of indoleamine 2,3-dioxygenase and tryptophanyl-tRNA-synthetase by CTLA-4-Fc in human CD4<sup>+</sup> T cells. *Blood* 105: 1574–1581.38.
41. Carter L, Fouser LA, Jussif J, Fitz L, Deng B, et al. (2002) PD-1:PD-L inhibitory pathway affects both CD4(+) and CD8(+) T cells and is overcome by IL-2. *Eur J Immunol* 32: 634–643.
42. Ito T, Ueno T, Clarkson MR, Yuan X, Jurewicz MM, et al. (2005) Analysis of the role of negative T cell costimulatory pathways in CD4 and CD8 T cell-mediated alloimmune responses in vivo. *J Immunol* 174: 6648–6656.
43. Park MJ, Min SY, Park KS, Cho YG, Cho ML, et al. (2008) Indoleamine 2,3-dioxygenase-expressing dendritic cells are involved in the generation of CD4<sup>+</sup>CD25<sup>+</sup> regulatory T cells in Peyer's patches in an orally tolerized, collagen-induced arthritis mouse model. *Arthritis Res Ther* 10: R11.
44. Yu G, Fang M, Gong M, Liu L, Zhong J, et al. (2008) Steady state dendritic cells with forced IDO expression induce skin allograft tolerance by upregulation of regulatory T cells. *Transpl Immunol* 18: 208–219.
45. Chen W, Liang X, Peterson AJ, Munn DH, Blazar BR (2008) The indoleamine 2,3-dioxygenase pathway is essential for human plasmacytoid dendritic cell-induced adaptive T regulatory cell generation. *J Immunol* 181: 5396–5404.46.
46. Shaw JM, Hunt PW, Critchfield JW, McConnell DH, Garcia JC (2011) Increased Frequency of Regulatory T-Cells Accompanies Increased T-Cell Immune Activation in Rectal Mucosa of HIV+ Non-Controllers. *J Virol* 81: 11422–11434.
47. Weiss L, Donkova-Petrini V, Caccavelli L, Balbo M, Carboneil C, et al. (2004) Human immunodeficiency virus driven expansion of CD4<sup>+</sup>CD25<sup>+</sup> regulatory T cells, which suppress HIV specific CD4 T-cell responses in HIV-infected patients. *Blood* 104: 3249–3256.
48. Aandahl EM, Michaelsson J, Moretto WJ, Hecht FM, Nixon DF (2004) Human CD4<sup>+</sup> CD25<sup>+</sup> regulatory T cells control T cell responses to human immunodeficiency virus and cytomegalovirus antigens. *J Virol* 78: 2454–2459.
49. Kinter A, McNally J, Riggan L, Jackson R, Roby G, et al. (2007) Suppression of HIV-specific T cell activity by lymph node CD25<sup>+</sup> regulatory T cells from HIV-infected individuals. *Proc Natl Acad Sci USA* 104: 3390–3395.
50. Littman DR, Rudensky AY (2010) Th17 and regulatory T cells in mediating and restraining inflammation. *Cell* 140: 845–858.
51. Lages CS, Suffia I, Vella PA, Huang B, Warshaw G, et al. (2008) Functional regulatory T cells accumulate in aged hosts and promote chronic infectious disease reactivation. *J Immunol* 181: 1835–1848.
52. Franceschi C, Capri M, Monti D, Giunta S, Olivieri F, et al. (2007) Inflammaging and anti-inflammaging: a systemic perspective on aging and longevity emerged from studies in humans. *Mech Ageing Dev* 128: 92–106.
53. Fulop T, Larbi A, Witkowski JM, McElhaney J, Loeb M, et al. (2010) Aging, frailty and age-related diseases. *Biogerontology* 11: 547–563.
54. Roberts T, Beyers N, Aguirre A, Walz G (2007) Immunosuppression during active tuberculosis is characterized by decreased interferon- $\gamma$  production and CD25 expression with elevated forkhead box P3, transforming growth factor- $\beta$ , and interleukin-4 mRNA levels. *J Infect Dis* 195: 870–878.
55. Rubie C, Kempf K, Hans J, Su T, Tilton B, et al. (2005) Housekeeping gene variability in normal and cancerous colorectal, pancreatic, esophageal, gastric and hepatic tissues. *Mol Cell Probes* 19: 101–119.
